# Supplementary material
Source: publisher figshare collection journal article supplement (https://gsapubs.figshare.com/ndownloader/files/35911310)
Supplement: Supplementary file 1 [file 35911310]

## SUPPLEMENTAL MATERIAL

Figure S1. WORLD OCEAN FLOOR SEDIMENTS. Map of seabed sediments from Dutkiewicz et al. (2015), showing that calcareous ooze occupies a significant portion (c. 30%) of seafloor. Thus, it is important to study its behaviour during remobilisation through submarine landsliding.

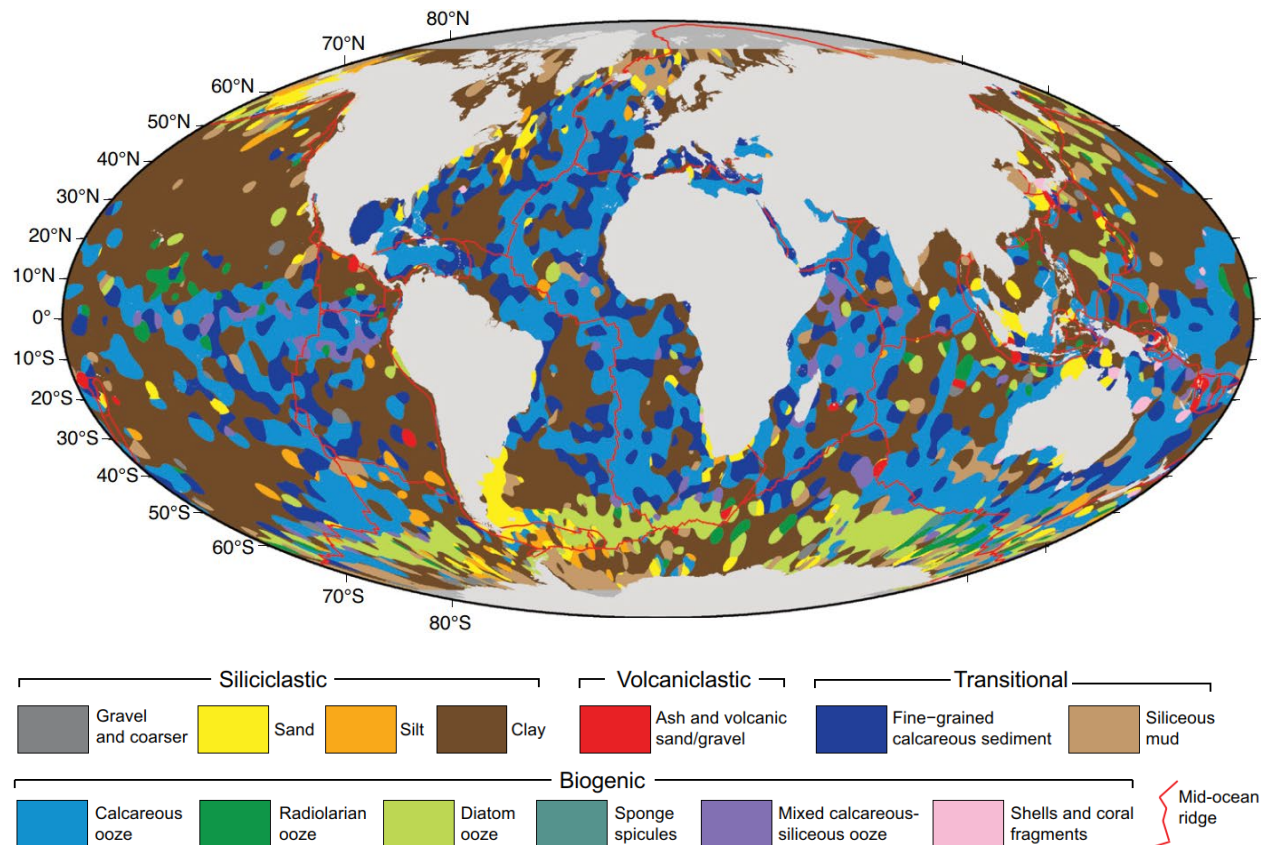

### References for Figure S1

Dutkiewicz, A., Müller, R. D., O'Callaghan, S., and Jónasson, H., 2015, Census of seafloor sediments in the world's ocean: *Geology*, v. 43, no. 9, p. 795-798.

TABLE S1. LIST OF SEISMIC AND WELL DATA PROVIDED BY GEOSCIENCE AUSTRALIA (<https://www.nopims.gov.au/>)

A list of seismic reflection data and their properties used in this study.

| No | Survey Name | Vintage | Bin Size (m) |        | Dominant Frequency* (Hz) | Vertical Resolution (m) |
|----|-------------|---------|--------------|--------|--------------------------|-------------------------|
|    |             |         | Xline        | Inline |                          |                         |
| 1  | Acme 3D     | 2006    | 18.75        | 25     | 40                       | 11                      |
| 2  | Draeck 3D   | 2006    | 18.75        | 25     | 40                       | 11                      |
| 3  | Duyfken 3D  | 2006    | 12.5         | 18.75  | 50                       | 9                       |
| 4  | Gorgon 3D   | 1992    | 20           | 25     | 40                       | 11                      |
| 5  | Io-Jansz 3D | 2005    | 18.75        | 12.5   | 60                       | 8                       |

*\*Dominant frequency at basal-shear surface (base of MTC) level.*

A list of well data and used in this study. Velocity and lithology data are from well reports.

| No | Well name               | Water velocity (m/s) | Near seabed sediments velocity (m/s) | Lithology        |
|----|-------------------------|----------------------|--------------------------------------|------------------|
| 1  | Bluebell-1              | 1524                 | -                                    | -                |
| 2  | Central Gorgon-1        | 1524                 | -                                    | -                |
| 3  | Chrysaor-1              | 1524                 | -                                    | -                |
| 4  | Gorgon-1                | 1524                 | -                                    | -                |
| 5  | North Gorgon-1          | 1524                 | -                                    | -                |
| 6  | Clio-1                  | 1500                 | -                                    | -                |
| 7  | Orthrus-1               | 1500                 | -                                    | -                |
| 8  | Io-1                    | 1524                 | -                                    | -                |
| 9  | Jansz-1                 | 1524                 | -                                    | -                |
| 10 | Jansz-3                 | 1524                 | -                                    | -                |
| 11 | <a href="#">ODP 762</a> | -                    | 1824                                 | Foraminifer ooze |

FIGURE S2. INSIGHTS ON OVERALL EMPLACEMENT PROCESSES FROM  $V_d/V_e$  RATIO

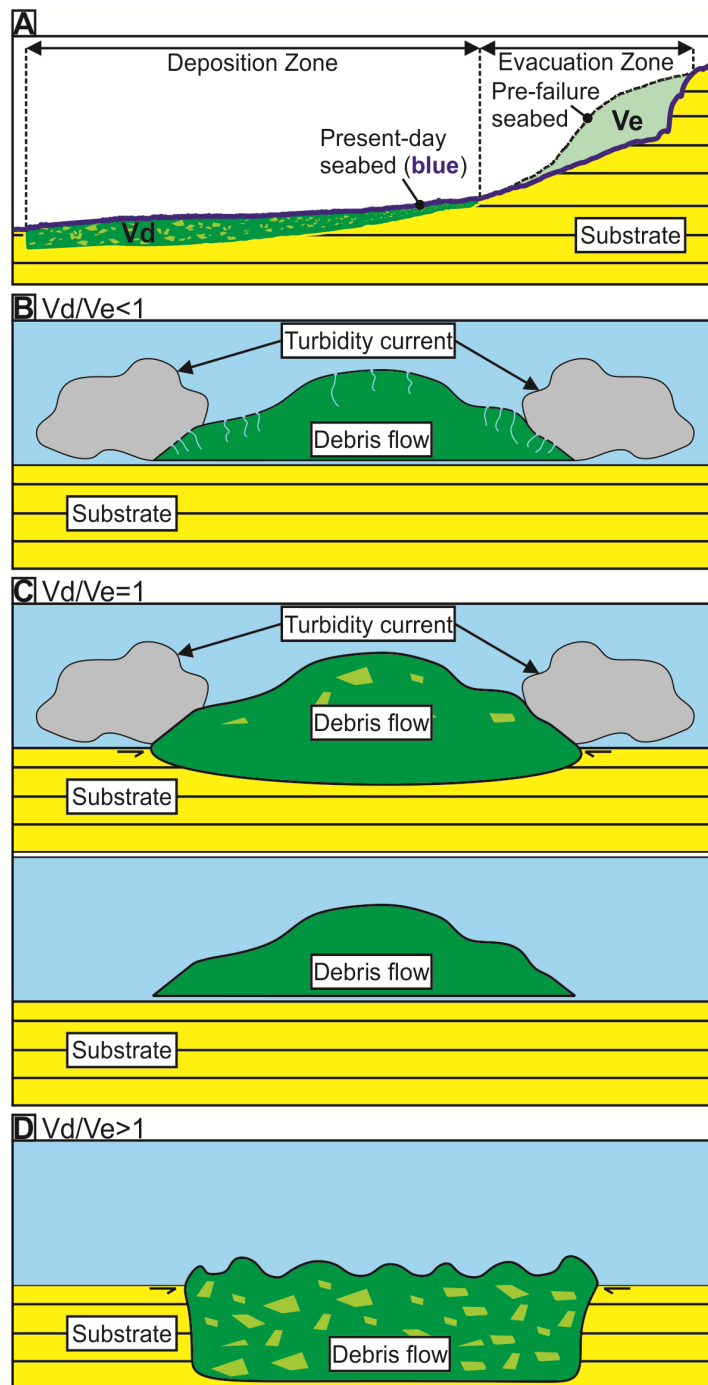

**A:** An illustration of evacuated volume ( $V_e$ ), volume of sediment between pre-failure and present-day seabed, in the evacuation zone; and deposited volume ( $V_d$ ), between base and top (present-day seabed) of a submarine landslide, in the deposition zone. We then use  $V_d/V_e$  ratio as a first-degree estimation of erosion by the submarine landslide, from which we suggest three hypothesis (B-D).

**B:**  $V_d/V_e < 1$  implies that  $V_d < V_e$ , suggesting volume loss during emplacement.

**C:**  $V_d/V_e = 1$  implies that  $V_d = V_e$ , either minor erosion balanced by partial flow transformation from debris flow to turbidity current (top), or hydroplaning during emplacement (overriding debris flow is separated from underlying substrate by a thin lubricating layer) (bottom).

**D:**  $V_d/V_e > 1$  implies that  $V_d > V_e$ , suggesting substrate entrainment and erosion during transport.

TABLE S2. VOLUME CALCULATION METHODS.

Three volume calculation methods used to calculate  $V_e$  and  $V_d$  of the Gorgon Slide.

| Methodology               | Volume Calculation                                                                                                                                                                                                                                                                                                                                                                                                                                           | Uncertainties                                                       | References                                                        |
|---------------------------|--------------------------------------------------------------------------------------------------------------------------------------------------------------------------------------------------------------------------------------------------------------------------------------------------------------------------------------------------------------------------------------------------------------------------------------------------------------|---------------------------------------------------------------------|-------------------------------------------------------------------|
| <b>Bulk volume</b>        | <p><math>V_e</math> is estimated by calculating the volume between present-day and interpreted pre-failure seabed within the evacuation zone</p> <p><math>V_d</math> is obtained by calculating the volume of the deposit between the basal-shear surface and top surface</p>                                                                                                                                                                                | Related to <b>seismic interpretation</b>                            | e.g. Piper et al. (1997); Sun et al. (2018)                       |
| <b>Compacted volume</b>   | <p>Similar approach to bulk volume method, but counts only the solid-state sediment fraction, removing water and pore-space (i.e. theoretical zero-porosity)</p> <p><i>Compacted <math>V_e</math> (<math>V_{ec}</math>)</i><br/> <math display="block">V_{ec} = V_e \times (100 - \text{porosity})/100</math> <i>Compacted <math>V_d</math> (<math>V_{dc}</math>)</i><br/> <math display="block">V_{dc} = V_d \times (100 - \text{porosity})/100</math> </p> | The same as the bulk volume, but include <b>porosity estimation</b> | e.g. Lamarche et al. (2008)                                       |
| <b>Theoretical volume</b> | <p><math>V_e</math> is assumed as a wedge-shaped geometry<br/> <math display="block">V_e = \frac{1}{2} \times \text{area} \times \text{scarp height}</math> </p> <p><math>V_d</math> is assumed as a half-ellipsoid geometry<br/> <math display="block">V_d: \frac{1}{6} \pi \times \text{thickness} \times \text{width} \times \text{length}</math> </p>                                                                                                    | <b>Oversimplified geometry</b>                                      | <p>e.g. McAdoo et al. (2000)</p> <p>e.g. Wilson et al. (2004)</p> |

An illustration of the three volume calculation methods used to calculate  $V_e$  and  $V_d$  of the Gorgon Slide.

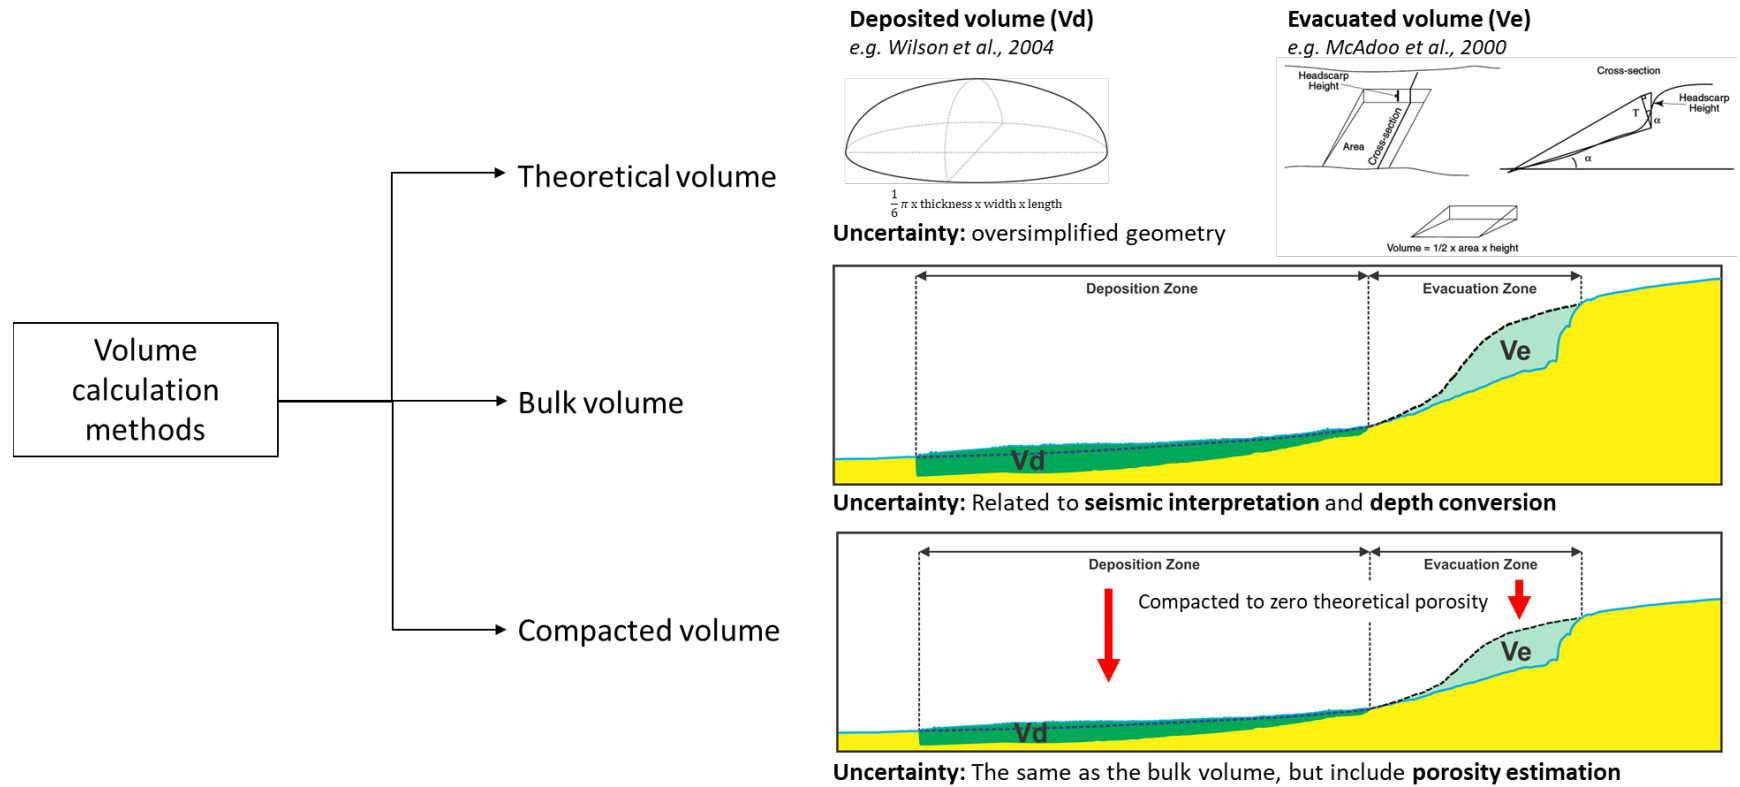

## References for Table S2

- Lamarche, G., Joanne, C., and Collot, J. Y., 2008, Successive, large mass-transport deposits in the south Kermadec fore-arc basin, New Zealand: The Matakaoa Submarine Instability Complex: *Geochemistry, Geophysics, Geosystems*, v. 9, no. 4.
- McAdoo, B., Pratson, L., and Orange, D., 2000, Submarine landslide geomorphology, US continental slope: *Marine Geology*, v. 169, no. 1, p. 103-136.
- Piper, D. J. W., Pirmez, C., Manley, P. L., Long, D., Flood, R. D., Normark, W. R., and Showers, W., Mass Transport Deposits of the Amazon Fan, *in* *Proceedings Ocean Drilling Program, Scientific Results 1997*, Volume 155, p. 109-146.
- Sun, Q., Alves, T., Lu, X., Chen, C., and Xie, X., 2018, True volumes of slope failure estimated from a Quaternary mass-transport deposit in the northern South China Sea: *Geophysical Research Letters*.
- Wilson, C. K., Long, D., and Bulat, J., 2004, The morphology, setting and processes of the Afen Slide: *Marine Geology*, v. 213, no. 1-4, p. 149-167.

FIGURE S3. VOLUME BALANCE OF THE GORGON SLIDE. Evacuated volume calculation (for bulk and compacted volume methods) used two interpretations of reconstructed slope as minimum (A-B) and maximum (B-C) estimates.

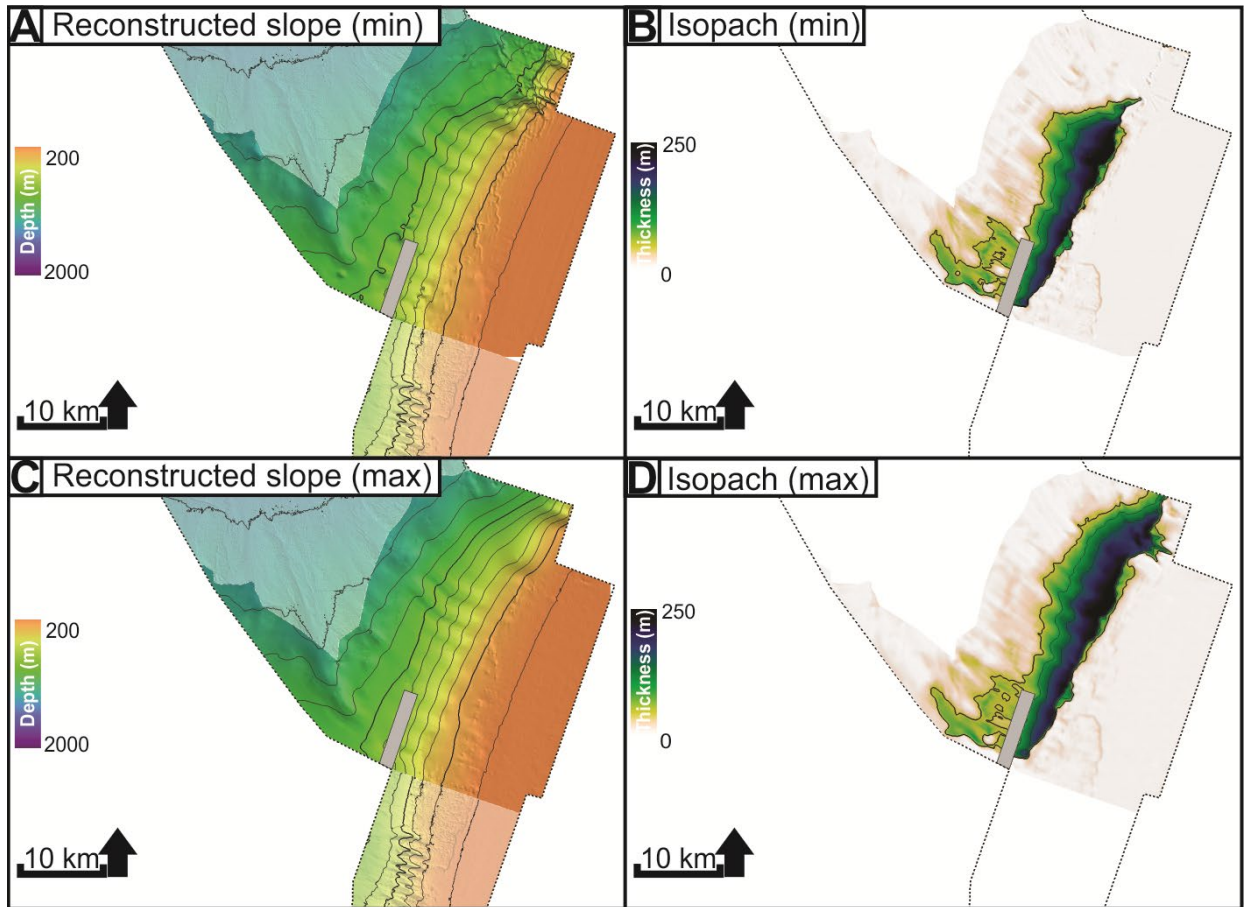

Calculated Vd and Ve of the Gorgon Slide using the three methods.

**Minimum estimate (Fig. DR5A-B)**

| Methods     | Ve (km <sup>3</sup> ) | Vd (km <sup>3</sup> ) | Vd/Ve |
|-------------|-----------------------|-----------------------|-------|
| Bulk        | 31                    | 509                   | 16.4  |
| Compacted   | 19                    | 255                   | 13.4  |
| Theoretical | 115                   | 550                   | 4.8   |

**Maximum estimate (Fig. DR5C-D)**

| Methods     | Ve (km <sup>3</sup> ) | Vd (km <sup>3</sup> ) | Vd/Ve |
|-------------|-----------------------|-----------------------|-------|
| Bulk        | 43                    | 509                   | 11.8  |
| Compacted   | 26                    | 255                   | 9.8   |
| Theoretical | 115                   | 550                   | 4.8   |

**The Gorgon Slide Morphometry**

|                                    |      |
|------------------------------------|------|
| Evacuation area (km <sup>2</sup> ) | 656  |
| Deposition area (km <sup>2</sup> ) | 1760 |
| Scarp height (m)                   | 350  |
| Max. thickness (m)                 | 500  |
| Length (km)                        | 70   |
| Width (km)                         | 30   |

**Porosity assumption\***

|                                              |    |
|----------------------------------------------|----|
| ODP 762 near seabed sediments<br>(>371 mbsf) | 39 |
| Redeposited chalk                            | 50 |

*\*Near seabed sediments porosity is from ODP 762 data (see O'Brien and Manghnani, 1992) . Redeposited chalk could have porosity of 50-55% at time of deposition, prior to be buried (Hardman, 1982). This is in contrast with fine-grained siliciclastics, where redeposited sediments would have lower porosity than that of in-situ sediments (e.g. Sun et al., 2018).*

**References for Figure S3**

- Hardman, R., 1982, Chalk reservoirs of the North Sea: Bulletin of the Geological Society of Denmark, v. 30, no. 3-4, p. 119-137.
- O'Brien, D., and Manghnani, M., 1992, Physical properties of Site 762: a comparison of shipboard and shore-based laboratory results. In von Rad, U., Haq, BU, et al, *in* Proceedings Proc. ODP, Sci. Results 1992, Volume 122, p. 349-362.
- Sun, Q., Alves, T., Lu, X., Chen, C., and Xie, X., 2018, True volumes of slope failure estimated from a Quaternary mass-transport deposit in the northern South China Sea: Geophysical Research Letters.



TABLE S3. A LIST OF SUBMARINE LANDSLIDES ACROSS THE GLOBE USED IN THIS STUDY

| Name                       | Area<br>(km <sup>2</sup> ) | Height<br>Drop<br>(m) | Length<br>(km) | H/L   | Thickness<br>(m) | Volume<br>Evacuated<br>(km <sup>3</sup> ) |      | Volume<br>Deposited<br>(km <sup>3</sup> ) |       | Vd/Ve | Vd/Ve<br>Min | Vd/Ve<br>Max | Composition                                       | Geological<br>Setting          | Reference                                |
|----------------------------|----------------------------|-----------------------|----------------|-------|------------------|-------------------------------------------|------|-------------------------------------------|-------|-------|--------------|--------------|---------------------------------------------------|--------------------------------|------------------------------------------|
| Ruatoria Debris Avalanche  | 3400                       | 3200                  | 62             | 0.052 | 1300             | 2570                                      | ±514 | 1958                                      | ±392  | 0.76  | 0.61         | 0.91         | Mixture                                           | Convergent<br>Margin           | Collot et al., 2001                      |
| MTD South China Sea        | 11100                      | 2800                  | 330            | 0.008 | 150              | 715                                       | -    | 629                                       | ±36   | 0.88  | 0.83         | 0.93         | Siliciclastic                                     | Passive<br>Margin              | Sun et al., 2018                         |
| Gebra Slide_A              | 280                        | 450                   | 70             | 0.006 | 175              | 20                                        | -    | 21                                        | -     | 1.05  | -            | -            | Mixture                                           | Extensional<br>Margin          | Imbo et al., 2003                        |
| Afen Slide Stage 1         | 48                         | 290                   | 12             | 0.024 | 8                | 0.126                                     | -    | 0.142                                     | -     | 1.13  | -            | -            | Siliciclastic                                     | Passive<br>Margin<br>(Glacial) | Wilson et al., 2004                      |
| Nataraja Slide             | 49000                      | 3150                  | 550            | 0.006 | 330              | 11000                                     | -    | 19000                                     | ±4000 | 1.73  | 1.36         | 2.09         | Mixture                                           | Passive<br>Margin              | Calves et al., 2015                      |
| Angola MTD                 | 430                        | -                     | 30             | -     | 200              | 10                                        | -    | 20                                        | -     | 2.00  | -            | -            | Siliciclastic                                     | Passive<br>Margin              | Gee et al., 2006                         |
| WMTD Amazon                | 10000                      | 3000                  | 245            | 0.012 | 150              | 650                                       | ±150 | 2000                                      | -     | 3.08  | 2.50         | 4.00         | Siliciclastic                                     | Passive<br>Margin              | Piper. et al., 1997                      |
| Viper Slide                | 18.7                       | 160                   | 5.5            | 0.029 | 31               | 0.025                                     | -    | 0.099                                     | -     | 3.96  | -            | -            | Mixture<br>(siliciclastic<br>and<br>carbonate)    | Passive<br>Margin              | Webster et al.,<br>2016                  |
| Brunei Slide               | 5300                       | 2300                  | 120            | 0.019 | 240              | 240                                       | -    | 1200                                      | ±12   | 5.00  | 4.95         | 5.05         | Siliciclastic                                     | Transpressive<br>Margin        | Gee et al., 2007                         |
| Matakaoa Debris Flow (MDF) | 10000                      | 2050                  | 200            | 0.010 | 300              | 140                                       | ±40  | 1050                                      | ±100  | 7.50  | 6.79         | 8.21         | Siliciclastic                                     | Convergent<br>Margin           | Joanne et al., 2013                      |
| Gondola Slide (G1-MTD)     | 1050                       | 955                   | 55             | 0.017 | 50               | 4.3                                       | -    | 40                                        | -     | 9.30  | -            | -            | Siliciclastic<br>(muddy<br>deposits)              | Convergent<br>Margin           | Dalla Valle et al.,<br>2015              |
| Gorgon Slide               | 1593                       | 1000                  | 65             | 0.015 | 500              | 19                                        | -    | 255                                       | -     | 13.4  | 4.79         | 16.4         | Carbonate<br>(foraminifer<br>nannofossil<br>ooze) | Passive<br>Margin              | Nugraha et al. ( <i>this<br/>study</i> ) |

### References for Table S3

- Calvès, G., Huuse, M., Clift, P. D., and Brusset, S., 2015, Giant fossil mass wasting off the coast of West India: the Nataraja submarine slide: *Earth and Planetary Science Letters*, v. 432, p. 265-272.
- Collot, J. Y., Lewis, K., Lamarche, G., and Lallemand, S., 2001, The giant Ruatoria debris avalanche on the northern Hikurangi margin, New Zealand: Result of oblique seamount subduction: *Journal of Geophysical Research: Solid Earth*, v. 106, no. B9, p. 19271-19297.
- Dalla Valle, G., Gamberi, F., Foglini, F., and Trincardi, F., 2015, The Gondola slide: a mass transport complex controlled by margin topography (South-Western Adriatic Margin, Mediterranean Sea): *Marine Geology*, v. 366, p. 97-113.
- Gee, M., Gawthorpe, R., and Friedmann, S., 2006, Triggering and evolution of a giant submarine landslide, offshore Angola, revealed by 3D seismic stratigraphy and geomorphology: *Journal of Sedimentary Research*, v. 76, no. 1, p. 9-19.
- Gee, M., Uy, H., Warren, J., Morley, C., and Lambiase, J., 2007, The Brunei slide: a giant submarine landslide on the North West Borneo Margin revealed by 3D seismic data: *Marine Geology*, v. 246, no. 1, p. 9-23.
- Imbo, Y., De Batist, M., Canals, M., Prieto, M., and Baraza, J., 2003, The Gebra slide: a submarine slide on the Trinity Peninsula Margin, Antarctica: *Marine Geology*, v. 193, no. 3-4, p. 235-252.
- Joanne, C., Lamarche, G., and Collot, J. Y., 2013, Dynamics of giant mass transport in deep submarine environments: the Matakaoa Debris Flow, New Zealand: *Basin Research*, v. 25, no. 4, p. 471-488.
- Piper, D. J. W., Pirmez, C., Manley, P. L., Long, D., Flood, R. D., Normark, W. R., and Showers, W., Mass Transport Deposits of the Amazon Fan, *in* *Proceedings Ocean Drilling Program, Scientific Results 1997*, Volume 155, p. 109-146.
- Sun, Q., Alves, T., Lu, X., Chen, C., and Xie, X., 2018, True volumes of slope failure estimated from a Quaternary mass-transport deposit in the northern South China Sea: *Geophysical Research Letters*.
- Webster, J. M., George, N. P., Beaman, R. J., Hill, J., Puga-Bernabéu, Á., Hinestrosa, G., Abbey, E. A., and Daniell, J. J., 2016, Submarine landslides on the Great Barrier Reef shelf edge and upper slope: A mechanism for generating tsunamis on the north-east Australian coast?: *Marine Geology*, v. 371, p. 120-129.
- Wilson, C. K., Long, D., and Bulat, J., 2004, The morphology, setting and processes of the Afen Slide: *Marine Geology*, v. 213, no. 1-4, p. 149-167

FIGURE S47. RELATIONSHIP BETWEEN EROSIVITY AND OTHER SLIDE PARAMETERS

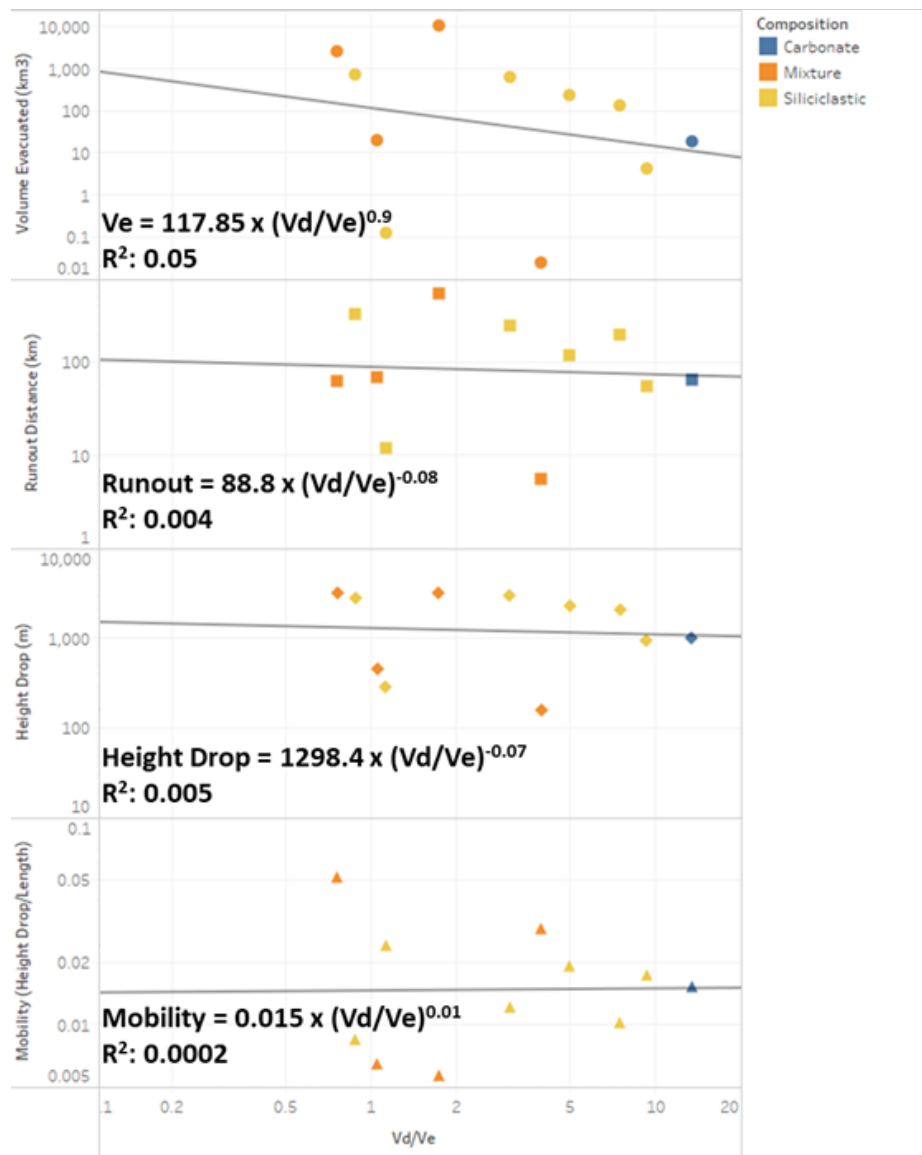

We found no clear relationship found between erosivity ( $V_d/V_e$  ratio) and those parameters. This suggests that they may have limited predictive power, and thus local factors influencing transport processes (such as topography variation) are at play.

FIGURE S8. GEOTECHNICAL BEHAVIOUR OF CARBONATE OOZE, OFFSHORE NW AUSTRALIA. Strength degradation of sediments during cyclic T-bar test (modified from Gaudin and White, 2009). The Y axis is a ratio of remoulded over initial shear strength, and the X axis is the number of T-bar cycles. It can be seen that West African Clay (diatomaceous sediments from offshore Angola) have a residual post-failure strength that is c. 55% of the initial shear strength, compared to carbonate silts from deepwater NW Australia that can be as low as 10%.

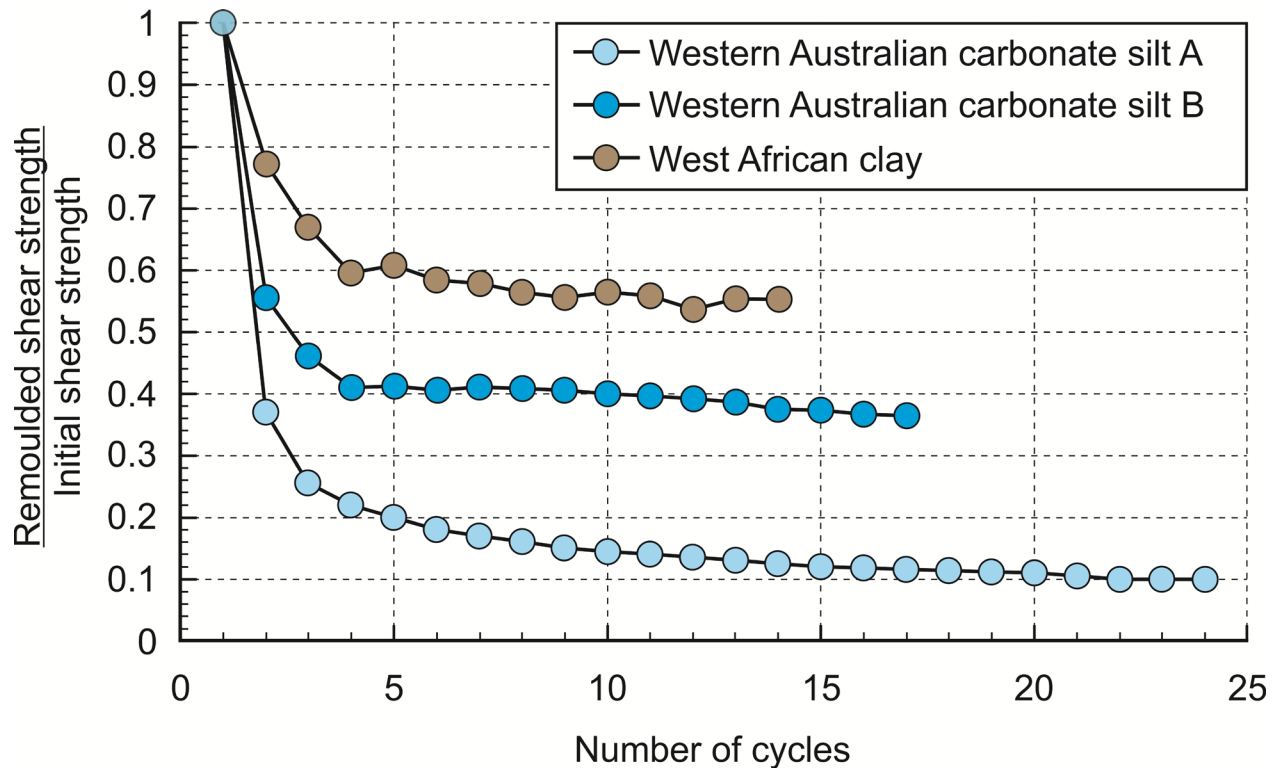

#### References for Figure S8

Gaudin, C., and White, D., 2009, New centrifuge modelling techniques for investigating seabed pipeline behaviour, *in* Proceedings 17th International Conference on Soil Mechanics and Geotechnical Engineering, Alexandria, 2009, p. 448-451.
